# Supplementary material
Source: PubMed Central journal article supplement (PMC3582831)
Supplement: NIHMS437632-supplement-775_2012_973_MOESM1_ESM.pdf [file NIHMS437632-supplement-775_2012_973_MOESM1_ESM.pdf]

## Supplementary Material

### **Conformational change and human cytochrome *c* function: mutation of residue 41 modulates caspase activation and destabilizes Met-80 coordination**

Tracy M. Josephs<sup>1</sup>, Matthew D. Liptak<sup>2,†</sup>, Gillian Hughes<sup>1</sup>, Alexandra Lo<sup>1</sup>, Rebecca M. Smith<sup>2</sup>, Sigurd M. Wilbanks<sup>1</sup>, Kara L. Bren<sup>2</sup> and Elizabeth C. Ledgerwood<sup>1,✉</sup>

<sup>1</sup>From the Department of Biochemistry, University of Otago, PO Box 56, Dunedin 9054, New Zealand

<sup>2</sup>Department of Chemistry, University of Rochester, Rochester, New York 14627, United States

✉Elizabeth Ledgerwood, Fax: (64 3) 479-7866; E-mail: [liz.ledgerwood@otago.ac.nz](mailto:liz.ledgerwood@otago.ac.nz)

<sup>†</sup>Present Address: Department of Chemistry, University of Vermont, Burlington, VT 05405

**Table S1.** Comparison of  $^1\text{H}$  chemical shifts of oxidized G41T cytochrome *c* with the reported shifts for non-native conformations of oxidized horse cytochrome *c*

| Protein            | Proposed Axial Ligation | $\delta$ (ppm)    |                   |                   |                   | Ref.      |
|--------------------|-------------------------|-------------------|-------------------|-------------------|-------------------|-----------|
|                    |                         | 8-CH <sub>3</sub> | 5-CH <sub>3</sub> | 3-CH <sub>3</sub> | 1-CH <sub>3</sub> |           |
| Horse cyt <i>c</i> | His/Lys                 | 23.9              | 22.2              | 11.9              | 13.2              | 1         |
| G41T               | His/Lys                 | 24.3              | 22.6              |                   |                   | this work |
| Horse cyt <i>c</i> | His/His                 | 25.7              | 18.6              | 13.5              |                   | 1         |
| G41T               | His/His                 | 25.2              | 18.9              |                   |                   | this work |

#### Reference

1. Russell, B S, Melenkivitz, R, and Bren, K L. (2000) Proc Natl Acad Sci U S A 97:8312-8317

**Table S2.** Chemical shifts (ppm) of selected protons in reduced human cytochrome *c* variants

|                           | <b>WT</b> | <b>G41S</b> | <b>G41T</b> |
|---------------------------|-----------|-------------|-------------|
| <b>L35</b>                |           |             |             |
| HN                        | 7.01      | 7.02        | 7.04        |
| $\alpha$ -H               | 3.65      | 3.63        | 3.63        |
| $\beta$ -H                | 2.14      | 2.11        | 2.16        |
| $\beta$ -H                | 1.55      | 1.56        | 1.54        |
| $\gamma$ -H               | 1.31      | 1.32        | 1.27        |
| $\delta$ -CH <sub>3</sub> | 0.87      | 0.99        | 0.97        |
| $\delta$ -CH <sub>3</sub> | 0.69      | 0.69        | 0.70        |
| <b>I57</b>                |           |             |             |
| HN                        | 6.55      | 6.56        | 6.59        |
| $\alpha$ -H               | 4.41      | 4.41        | 4.40        |
| $\beta$ -H                | 1.80      | 1.77        | 1.73        |
| $\gamma$ -H1              | 0.93      | 0.85        | 0.85        |
| $\gamma$ -H2              | 0.42      | 0.36        | 0.52        |
| $\gamma$ -CH <sub>3</sub> | 0.70      | 0.71        | 0.68        |
| $\delta$ -CH <sub>3</sub> | -0.70     | -0.76       | -0.68       |
| <b>W59</b>                |           |             |             |
| $\epsilon$ 3-H            | 7.61      | 7.60        | 7.60        |
| $\zeta$ 3-H               | 5.68      | 5.66        | 5.66        |
| $\eta$ 2-H                | 6.68      | 6.67        | 6.68        |
| $\zeta$ 2-H               | 7.07      | 7.07        | 7.07        |
| <b>G60</b>                |           |             |             |
| NH                        | 7.95      | 7.93        | 7.90        |
| $\alpha$ 1-H              | 4.21      | 4.22        | 4.22        |
| $\alpha$ 2-H              | 3.92      | 3.90        | 4.01        |
| <b>L64</b>                |           |             |             |
| HN                        | 8.95      | 8.96        | 8.97        |
| $\alpha$ -H               | 4.38      | 4.39        | 4.39        |
| $\beta$ -H                | 2.11      | 2.13        | 2.13        |
| $\gamma$ -H               | 1.28      | 1.29        | 1.29        |
| $\delta$ -CH <sub>3</sub> | 0.75      | 0.80        | 0.74        |
| $\delta$ -CH <sub>3</sub> | 0.50      | 0.52        | 0.53        |

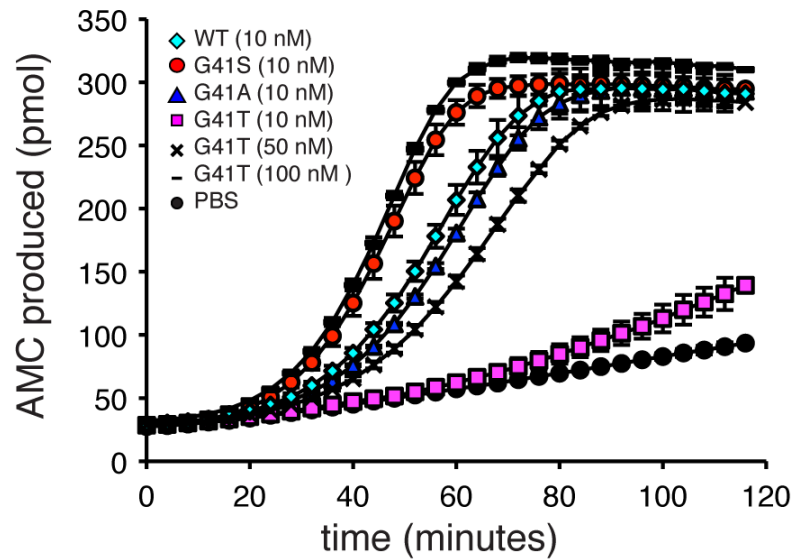

**Fig. S1** Changes at residue 41 in cytochrome *c* modulate caspase activation. Cleavage of the caspase 3 substrate acetyl-Asp-Glu-Val-Asp-7-amino-4-methylcoumarin was monitored at 37°C in U937 cytosol with the addition of 10 nM wild-type (*WT*), G41S, G41A or G41T, 50 nM G41T, 100 nM G41T cytochromes *c* or phosphate-buffered saline (*PBS*) at pH 7.25. All reactions contained 1 mM dATP and 5 mM dithiothreitol.  $n = 3 \pm SD$ . This figure reproduces figure 2, showing error bars. *AMC* 7-amino-4-methylcoumarin

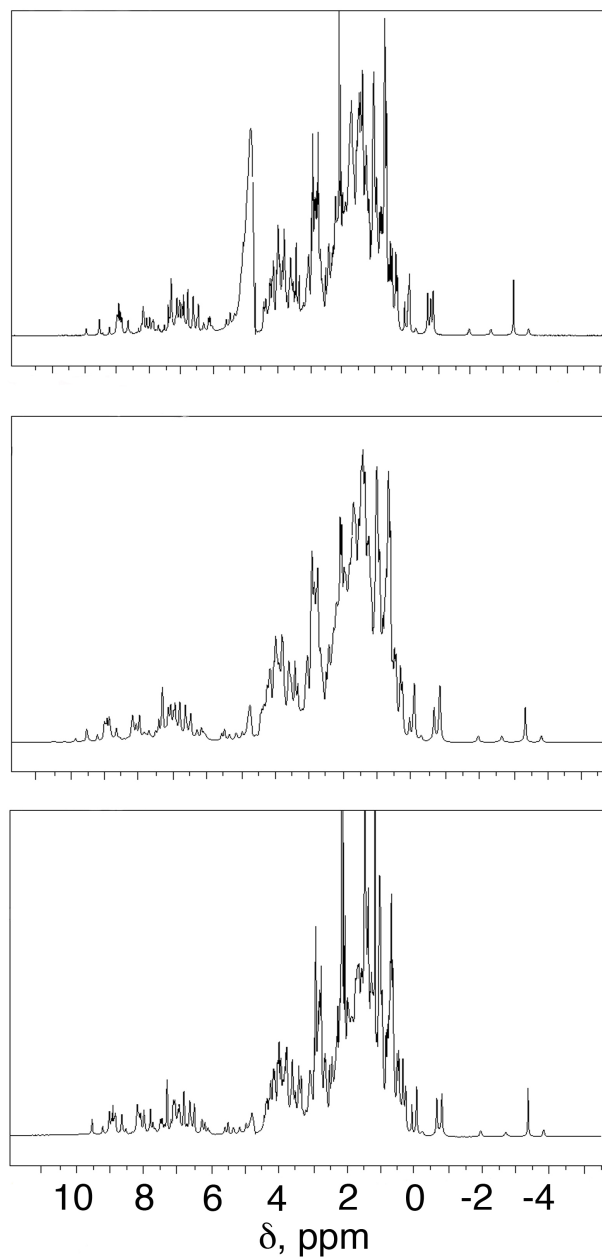

**Fig. S2** One-dimensional NMR spectra of reduced wild-type (top), G41S (middle), and G41T (bottom) cytochromes *c*. Samples contain 1 mM protein in 45 mM sodium phosphate, 10% D<sub>2</sub>O, pH 7.0, 25 °C. The characteristic upfield-shifted resonances indicating axial Met ligation between -2 and -4 ppm are visible in each spectrum.
